# Supplementary material
Source: PubMed Central journal article supplement (PMC8808875)
Supplement: 13._Supplementary_Table_1_1.pdf [file 13._Supplementary_Table_1_1.pdf]

Table 1. RTqPCR Primers

| <b>Gene Name</b>                                     | <b>GeneID</b>    | <b>Forward primer sequences</b> | <b>Reverse primer sequences</b> |
|------------------------------------------------------|------------------|---------------------------------|---------------------------------|
| Actin Beta                                           | <b>ACTB</b>      | AGCACAGAGCCTCGCCTTT             | CGGCGATATCATCATCCAT             |
| Aggrecan                                             | <b>ACAN</b>      | GTGCCTATCAGGACAAGGTCT           | GATGCCTTTCACCACGACTTC           |
| AKT Serine/Threonine Kinase 1                        | <b>AKT1</b>      | ATGGCGCTGAGATTGTGTCA            | CCCGGTACACCACGTTCTTC            |
| CD14/Myeloid Cell-Specific Leucine-Rich Glycoprotein | <b>CD14</b>      | CAACCTAGAGCCGTTTCTAAAGC         | GCGCCTACCAGTAGCTGAG             |
| CD163/Hemoglobin Scavenger Receptor                  | <b>CD163</b>     | GCGGGAGAGTGGAAGTGAAAG           | GTTACAAATCACAGAGACCGCT          |
| Collagen Type 1 Alpha 1 Chain                        | <b>COL1A1</b>    | GTAACAGCGGTGAACCTGG             | CCTCGCTTTCCTTCCTCTCC            |
| Collagen Type II Alpha 1 Chain                       | <b>COL2A1</b>    | GGGATCGTGGTGACAAAGGT            | CTGGGCAGCAAAGTTTCCAC            |
| Hyaluronan And Proteoglycan Link Protein 1           | <b>HAPLN1</b>    | TCTGGTGCTGATTTCAATCTGC          | TGCTTGGATGTGAATAGCTCTG          |
| Hypoxanthine Phosphoribosyltransferase 1             | <b>HPRT1</b>     | TGCTGACCTGCTGGATTACA            | TCCCCTGTTGACTGGTCATT            |
| Matrix Metalloproteinase 13                          | <b>MMP13</b>     | CCAGACTTCACGATGGCATTG           | GGCATCTCCTCCATAATTTGGC          |
| <u>Primers tested with no detectable response:</u>   |                  |                                 |                                 |
| CD4/T-Cell Surface Glycoprotein CD4                  | <b>CD4</b>       | TGCCTCAGTATGCTGGCTCT            | GAGACCTTTGCCTCCTTGTTT           |
| Collagen Type X Alpha 1 Chain                        | <b>COL10A1</b>   | CCAGCACGCAGAATCCATC             | ATGCCTGTGGGCATTTGGTA            |
| KIT Proto-Oncogene Receptor Tyrosine Kinase          | <b>KIT/CD117</b> | CGTTCTGCTCCTACTGCTTCG           | CCCACGCGGACTATTAAGTCT           |
| Microfibril Associated Protein 5                     | <b>MFAP5</b>     | GGGTCAATAGTCAACGAGGAGA          | CTGTAGCGGGATCATTACCA            |
